# Supplementary material for: Construction of a highly active and water-resistant Ni-based catalyst for the HDO reaction of phenol
Source: Royal Society of Chemistry journal article supplement (doi:10.1039/d2se00918h), 2022-01-01
Supplement: d2se00918h1.pdf [file d2se00918h1.pdf]

## **Construction of highly active and water-resistant Ni-based catalyst for HDO reaction of phenol**

Shuai Wang<sup>1</sup>, Yanxiu Liu<sup>1</sup>, Mei Zhang<sup>1</sup>, Feng Li<sup>1</sup>, Yanguang Chen<sup>1</sup>, Hua Song<sup>1,\*</sup>

<sup>1</sup> Provincial Key Laboratory of Oil & Gas Chemical Technology, College of Chemistry & Chemical Engineering, Northeast Petroleum University, Daqing 163318, Heilongjiang, China

\*Corresponding author. Tel: 0459-6503167

E-mail: songhua2004@sina.com (Hua Song)

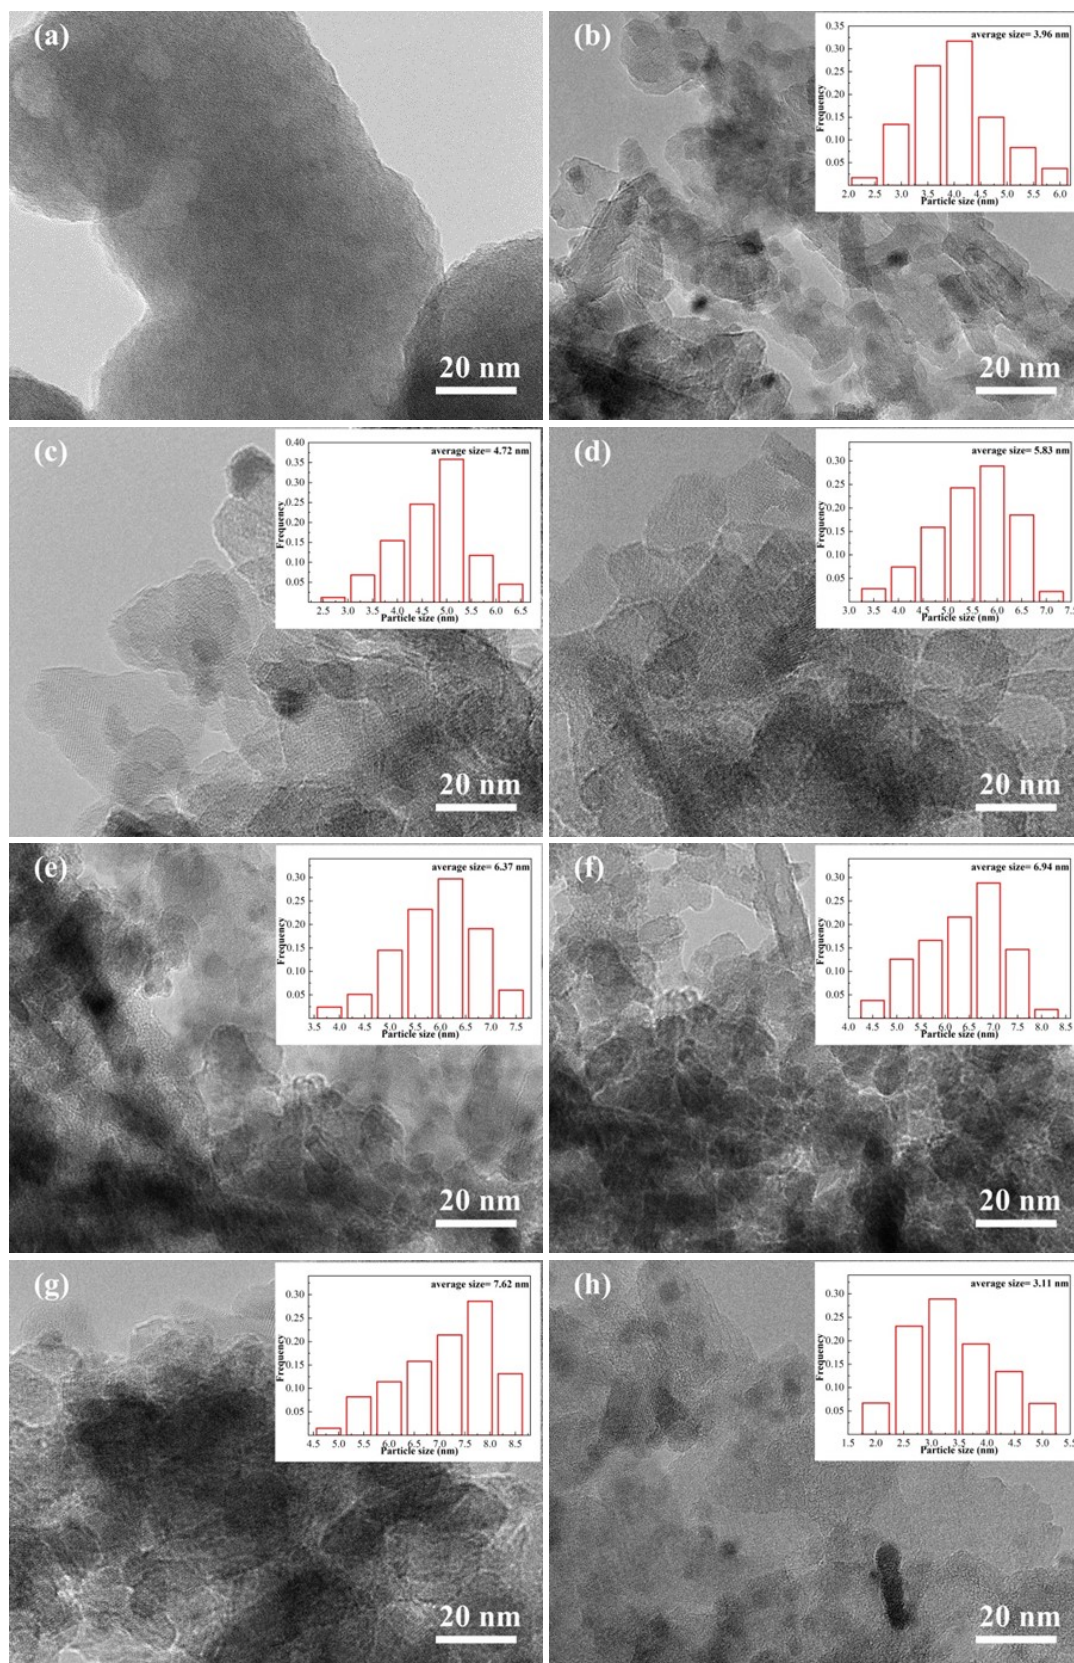

**Fig. S1** HRTEM and corresponding particle size distribution of Ni@C/Al<sub>2</sub>O<sub>3</sub>(1) (a), Ni@C/Al<sub>2</sub>O<sub>3</sub>(5), Ni@C/Al<sub>2</sub>O<sub>3</sub>(10), Ni@C/Al<sub>2</sub>O<sub>3</sub>(20), Ni@C/Al<sub>2</sub>O<sub>3</sub>(30), Ni@C/Al<sub>2</sub>O<sub>3</sub>(40), Ni@C/Al<sub>2</sub>O<sub>3</sub>(50) and Ni@C/Al<sub>2</sub>O<sub>3</sub>(5)-glucose.

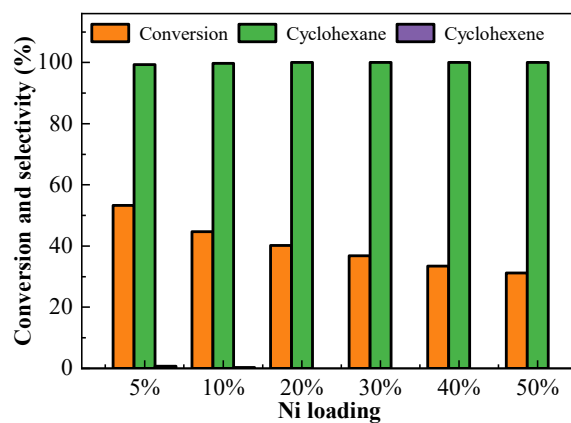

**Fig. S2** Dehydration of cyclohexanol over Ni@C/Al<sub>2</sub>O<sub>3</sub>(x) catalysts.  
Reaction conditions: T=250 °C, P=2 MPa, t=2 h

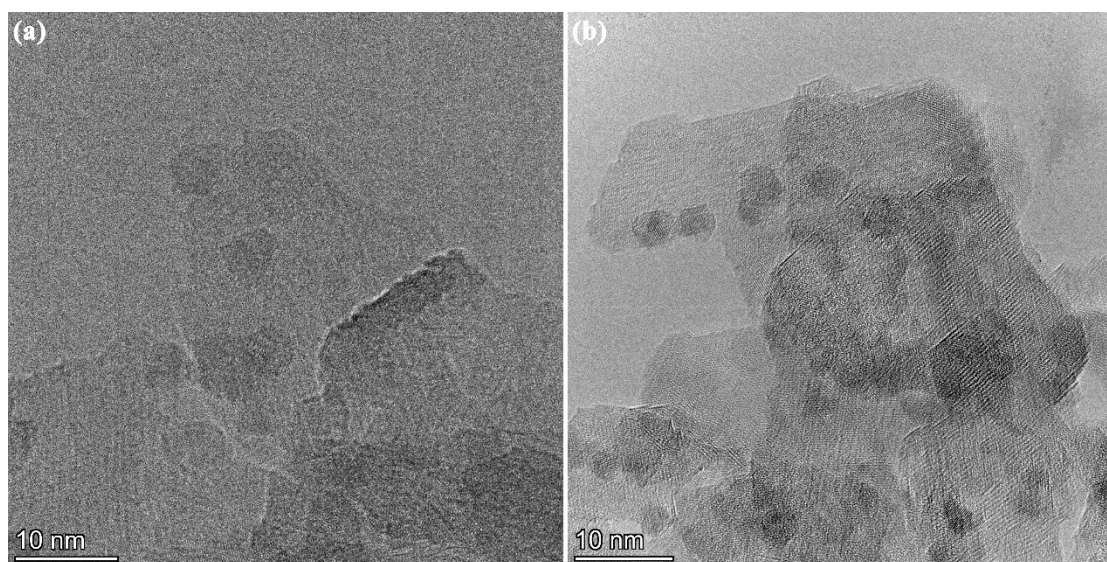

**Fig. S3** HRTEM of fresh (a) and spent (b) Ni@C/Al<sub>2</sub>O<sub>3</sub>-glucose catalyst
